# Supplementary material
Source: PubMed Central journal article supplement (PMC2443678)
Supplement: M800331200_1.pdf [file M800331200_1.pdf]

**Supplementary Table 1. Putative caspase-8 substrates with PoPS score >24.**

| Putative caspase-8 substrate                                                          | Score | Recognition Sequence (P10-P10')        | Experimental evidence                                                                                                                         |
|---------------------------------------------------------------------------------------|-------|----------------------------------------|-----------------------------------------------------------------------------------------------------------------------------------------------|
| Fanconi anemia, complementation group C (NM_00136)                                    | 25    | MFRCALLET <sub>306</sub> -GALEIIATIQ   | Cleaved at Asp <sub>306</sub> by an unidentified caspase in response to intrinsic apoptosis pathways (1)                                      |
| DNA directed RNA polymerase II polypeptide A (NM_000937)                              | 25    | ALQEWILETD <sub>1339</sub> -GVSLMRVLSE | Cleaved by recombinant caspase-3 and 8 <i>in vitro</i> ; cleaved by an unknown caspases during apoptosis (2)                                  |
| Histone deacetylase 7 splice variant 3 (AY321367)                                     | 25    | IPSAEDLETD <sub>375</sub> -GGGPGQVVDD  | Cleaved by recombinant caspases and endogenous caspase-8 in response to extrinsic apoptosis pathways (this publication)                       |
| Nucleobindin 1 (NM_006184)                                                            | 25    | QEVIDVLETD <sub>65</sub> -GHFREKLQAA   | ND                                                                                                                                            |
| Euchromatic histone methyltransferase 1 (NM_024757)                                   | 25    | ANGPDVLETD <sub>481</sub> -GLQEVPLCSC  | ND                                                                                                                                            |
| hypothetical protein MGC16353 (NM_138774)                                             | 25    | QYLLTLLETD <sub>86</sub> -GGLPGLEDGD   | ND                                                                                                                                            |
| Pleckstrin and Sec7 domain containing 4 (NM_012455)                                   | 25    | ASQSSLETD <sub>496</sub> -GEQPSSLKKK   | ND                                                                                                                                            |
| Phosphoinositide-3-kinase, regulatory subunit 5, p101 (NM_014308)                     | 25    | EEVEEDLETD <sub>337</sub> -GHCAERDSSL  | ND                                                                                                                                            |
| Tripartite motif-containing 3 (TRIM3); brain expressed ring finger (BERP) (NM_006458) | 24.07 | AQLELVLEVD <sub>303</sub> -GLRRSVLNLG  | Not cleaved by recombinant caspase-8 (this publication, data not shown)                                                                       |
| RAB9A (NM_004251)                                                                     | 24.07 | EFLNKDLEVD <sub>52</sub> -GHFVTMQIWD   | Not cleaved by recombinant caspase-8 (this publication, data not shown); cleavage site is in a tight turn between two beta strands (PDB 1S8F) |
| RAB9B (NM_01630)                                                                      | 24.07 | EFLNRDLEVD <sub>52</sub> -GRFVTLQIWD   | ND; predicted to have a similar structure to RAB9A                                                                                            |
| Prostaglandin-D synthase; hematopoietic prostaglandin D2 synthase (NM_014485)         | 24.07 | FGKIPILEVD <sub>57</sub> -GLTLHQSLAI   | ND; cleavage site is in a tight turn between two beta strands (PDB 1IYH)                                                                      |
| c-FLIP (NM_003879)                                                                    | 24.07 | LENSLLEVD <sub>376</sub> -GPAMKNVEFK   | c-FLIP-L cleaved by recombinant caspase-8 (3)                                                                                                 |
| AT-hook transcription factor (NM_030767)                                              | 24.07 | EGGGDSLEVD <sub>799</sub> -GVAATPGKAE  | ND                                                                                                                                            |
| guanylate binding protein 2, interferon-inducible (NP_004111)                         | 24.07 | RDFTLELEVD <sub>190</sub> -GEPITADDYL  | ND; based on identity with guanylate binding protein 1 (PDB 1F5N) this site is predicted to be accessible                                     |
| <b>Known and proposed caspase-8 substrates</b>                                        |       |                                        |                                                                                                                                               |
| Bid (NM_001196)                                                                       | 20.63 | WEGYDELQTD <sub>60</sub> -GNRSSHSLRG   | Caspase-8 cleaves recombinant and endogenous Bid in response to extrinsic apoptosis pathways (4,5)                                            |
| Procaspase-3 (NM_004346)                                                              | 20.56 | TELDCGIETD <sub>175</sub> -SGVDDDMACH  | Caspase-8 cleaves recombinant and endogenous procaspase-3 (6)                                                                                 |
| Procaspase-7 (NM_001227)                                                              | 12.72 | TELDDGIQAD <sub>198</sub> -SGPINDTDAN  | Caspase-8 cleaves recombinant procaspase-7 (7)                                                                                                |
| RIP (NM_003804)                                                                       | 11.09 | VKRMQSLQLD <sub>324</sub> -CVAVPSSRSN  | Caspase-8 cleaves RIP in extrinsic apoptosis (8)                                                                                              |
| Rat plectin (X59601)                                                                  | 8.31  | AENRALILRD <sub>2398</sub> -KDNTQRFLEE | A fragment of rat plectin can be cleaved by caspase-8 <i>in vitro</i> ; not confirmed <i>in vivo</i> (9)                                      |
| ND, not determined                                                                    |       |                                        |                                                                                                                                               |

1. Brodeur, I., Goulet, I., Tremblay, C. S., Charbonneau, C., Delisle, M. C., Godin, C., Huard, C., Khandjian, E. W., Buchwald, M., Levesque, G., and Carreau, M. (2004) *J Biol Chem* **279**, 4713-4720
2. Lu, Y., Luo, Z., and Bregman, D. B. (2002) *Biochem Biophys Res Commun* **296**, 954-961
3. Boatright, K. M., Deis, C., Denault, J. B., Sutherlin, D. P., and Salvesen, G. S. (2004) *Biochem J* **382**, 651-657
4. Li, H., Zhu, H., Xu, C. J., and Yuan, J. (1998) *Cell* **94**, 491-501
5. Luo, X., Budihardjo, I., Zou, H., Slaughter, C., and Wang, X. (1998) *Cell* **94**, 481-490
6. Stennicke, H. R., Jurgensmeier, J. M., Shin, H., Deveraux, Q., Wolf, B. B., Yang, X., Zhou, Q., Ellerby, H. M., Ellerby, L. M., Bredesen, D., Green, D. R., Reed, J. C., Froelich, C. J., and Salvesen, G. S. (1998) *J Biol Chem* **273**, 27084-27090
7. Denault, J. B., and Salvesen, G. S. (2003) *J Biol Chem* **278**, 34042-34050
8. Lin, Y., Devin, A., Rodriguez, Y., and Liu, Z. G. (1999) *Genes Dev* **13**, 2514-2526
9. Stegh, A. H., Herrmann, H., Lampel, S., Weisenberger, D., Andra, K., Seper, M., Wiche, G., Krammer, P. H., and Peter, M. E. (2000) *Mol Cell Biol* **20**, 5665-5679
